# Supplementary material for: A Phytochemical Constituent, (E)-Methyl-Cinnamate Isolated from Alpinia katsumadai Hayata Suppresses Cell Survival, Migration, and Differentiation in Pre-Osteoblasts
Source: MDPI journal article supplement (doi:10.3390/ijms21103700), 2020-05-24
Supplement: s1 [file s1]

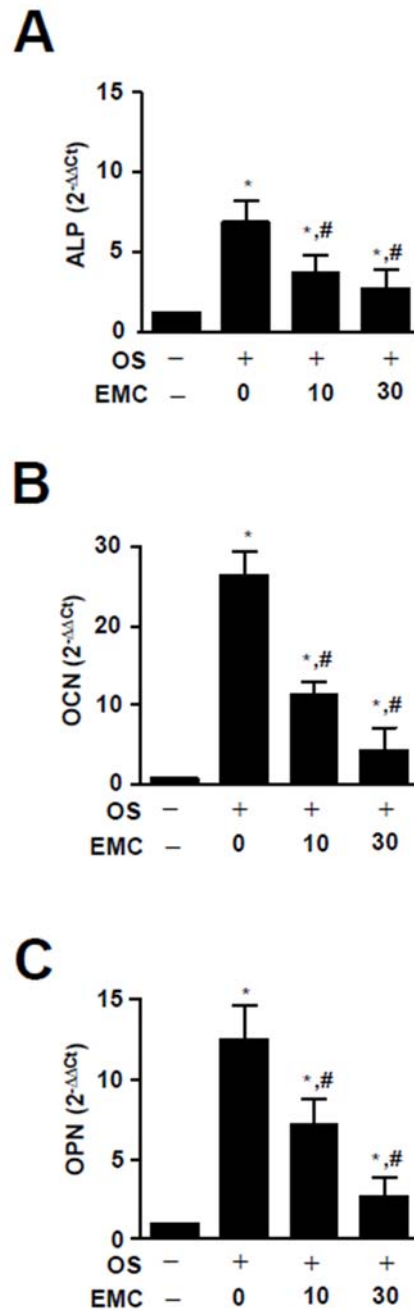

**Supplementary Figure S1.** Effects of EMC on Osteoblast differentiation. (A–C) Pre-osteoblasts were differentiated with the indicated concentrations of EMC for 7 days, and total RNA was isolated. Osteoblast-specific early and late marker genes including ALP (A), OCN (B), and OPN (C) were analyzed by qRT-PCR. The values obtained for the target gene expression were normalized to  $\beta$ -actin. The data are expressed as the mean  $\pm$  S.E.M. of experiments. \* ( $p < 0.05$ ) indicates statistically significant differences compared to the control. # ( $p < 0.05$ ) indicates statistically significant differences compared to the OS.
